# Supplementary material for: Highly lithium-ion selective ionophores: macrocyclic trinuclear complexes of methoxy-substituted arene ruthenium bridged by 2,3-pyridinediolate
Source: Royal Society of Chemistry journal article supplement (doi:10.1039/c3nj00761h), 2013-01-01
Supplement: c3nj00761h.pdf [file c3nj00761h.pdf]

**Electronic Supplementary Information for**

**Highly lithium-ion selective ionophores: macrocyclic trinuclear complexes of methoxy-substituted arene ruthenium bridged by 2,3-pyridinediolate**

**Shoichi Katsuta,\* Hajime Nomura, Takuya Egashira, Naoki Kanaya and Yoshihiro Kudo**

*Department of Chemistry, Graduate School of Science, Chiba University, 1-33 Yayoi-cho, Inage, Chiba 263-8522, Japan*

Table of Contents

|                                         |       |           |
|-----------------------------------------|-------|-----------|
| <b><sup>1</sup>H NMR Spectrum of 2</b>  | ..... | <b>S2</b> |
| <b><sup>13</sup>C NMR Spectrum of 2</b> | ..... | <b>S3</b> |
| <b>Mass Spectrum of 2</b>               | ..... | <b>S4</b> |
| <b>UV-Vis Absorption Spectrum of 2</b>  | ..... | <b>S5</b> |
| <b><sup>1</sup>H NMR Spectrum of 3</b>  | ..... | <b>S6</b> |
| <b><sup>13</sup>C NMR Spectrum of 3</b> | ..... | <b>S7</b> |
| <b>Mass Spectrum of 3</b>               | ..... | <b>S8</b> |
| <b>UV-Vis Absorption Spectrum of 3</b>  | ..... | <b>S9</b> |

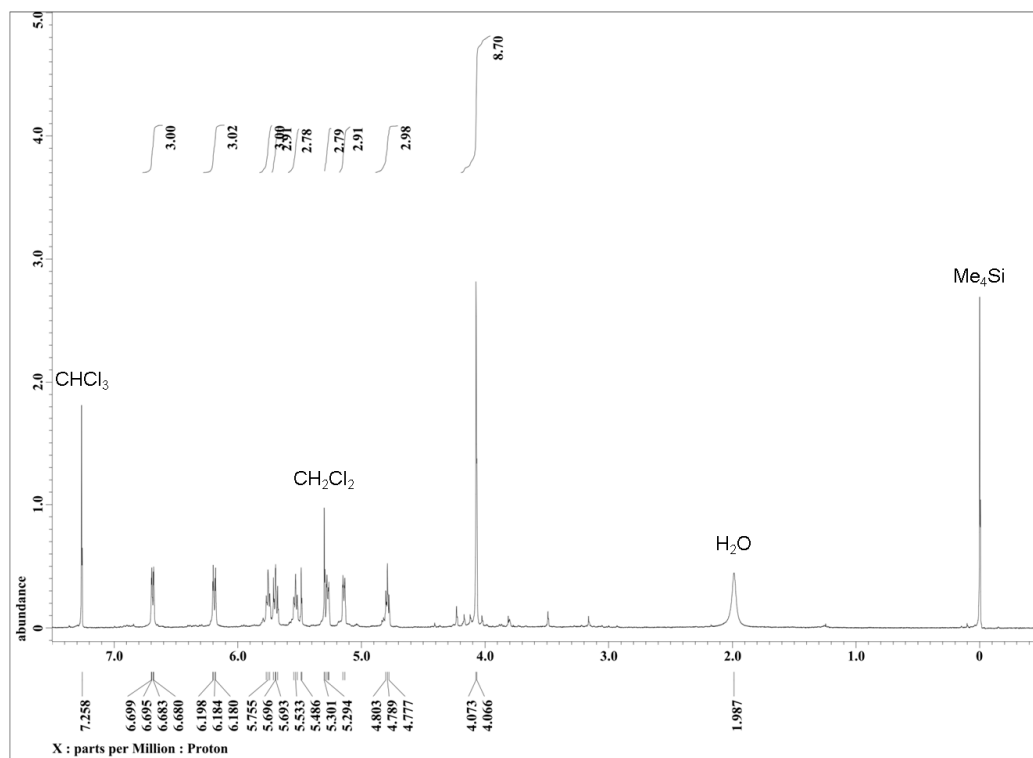

$^1\text{H}$  NMR Spectrum of 2 (400 MHz;  $\text{CDCl}_3$ ;  $\text{Me}_4\text{Si}$ )

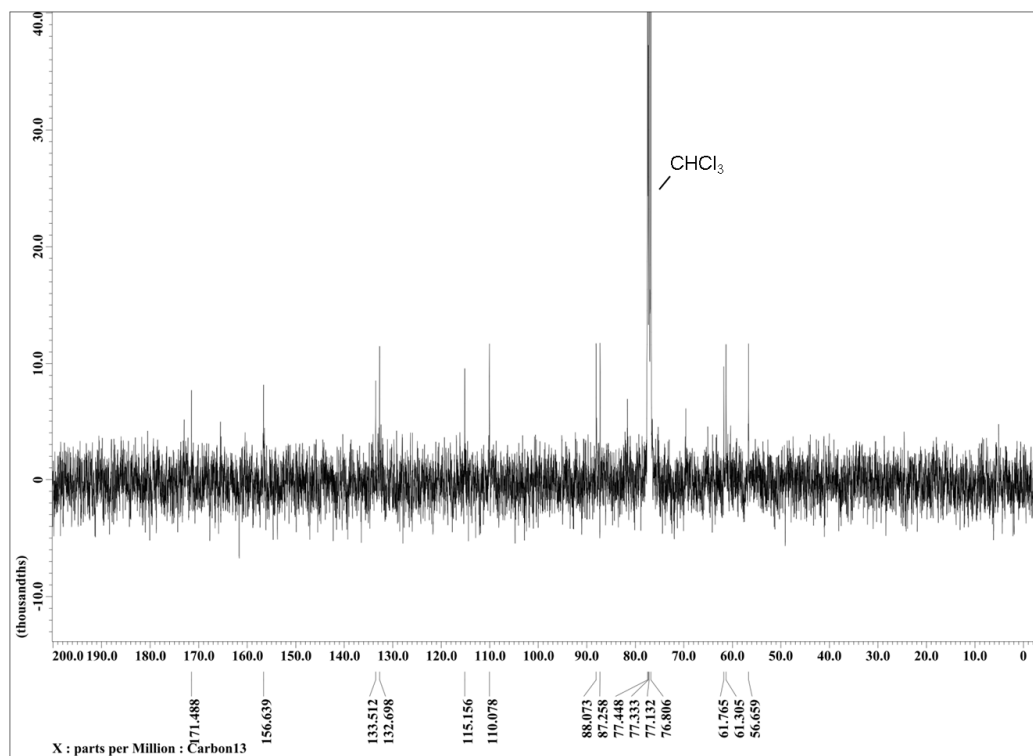

**<sup>13</sup>C NMR Spectrum of 2 (100 MHz; CDCl<sub>3</sub>; Me<sub>4</sub>Si)**

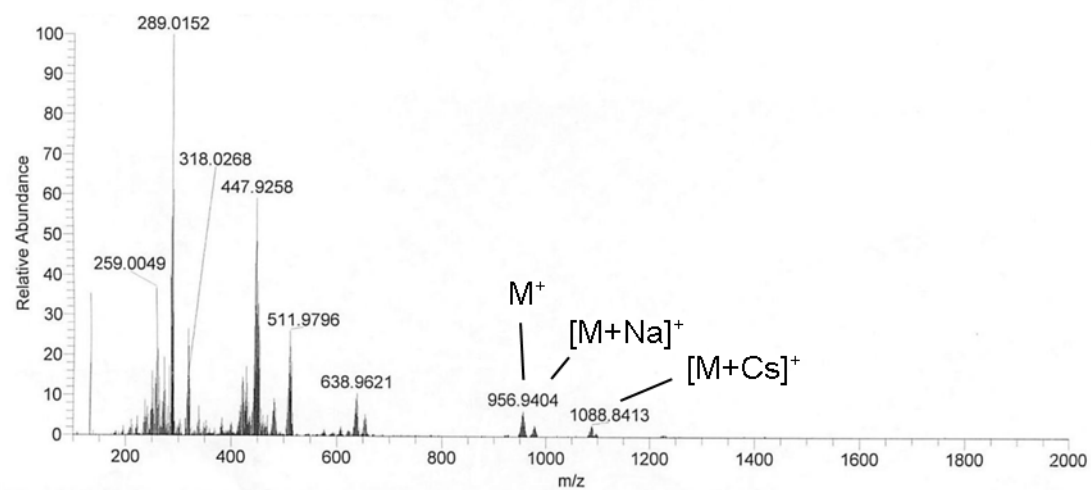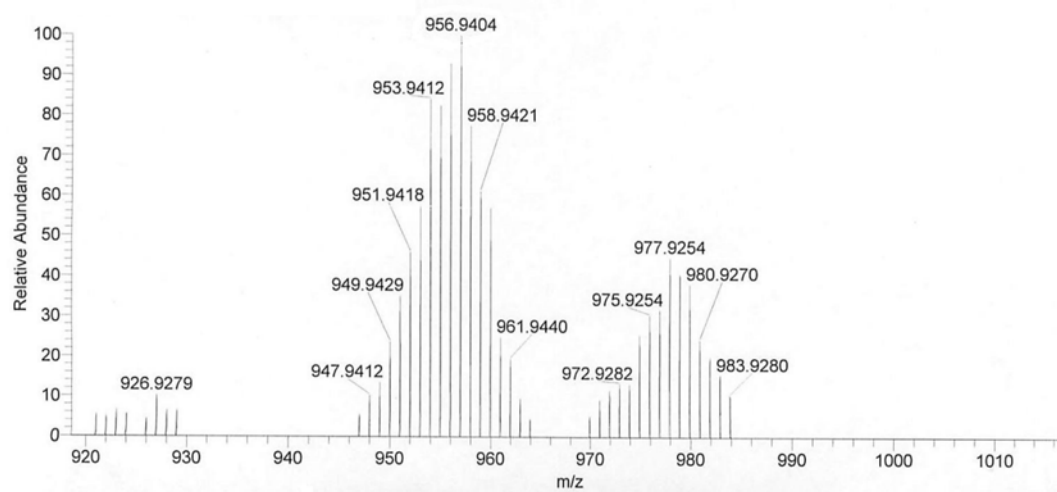

**Mass Spectrum of 2 (ESI+; CH<sub>3</sub>CN)**

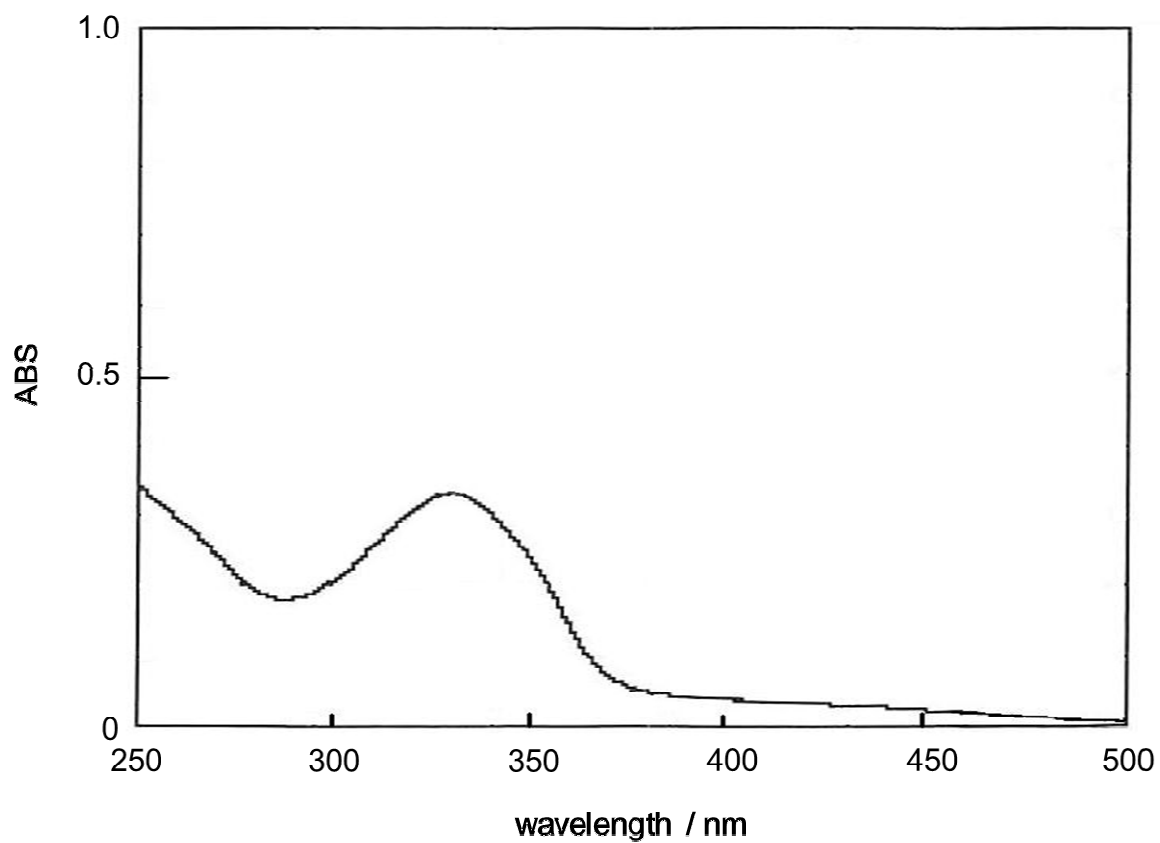

**UV-Vis Absorption Spectrum of 2 ( $1.32 \times 10^{-5} \text{ mol dm}^{-3}$ ;  $\text{CH}_2\text{Cl}_2$ ;  $25^\circ\text{C}$ )**

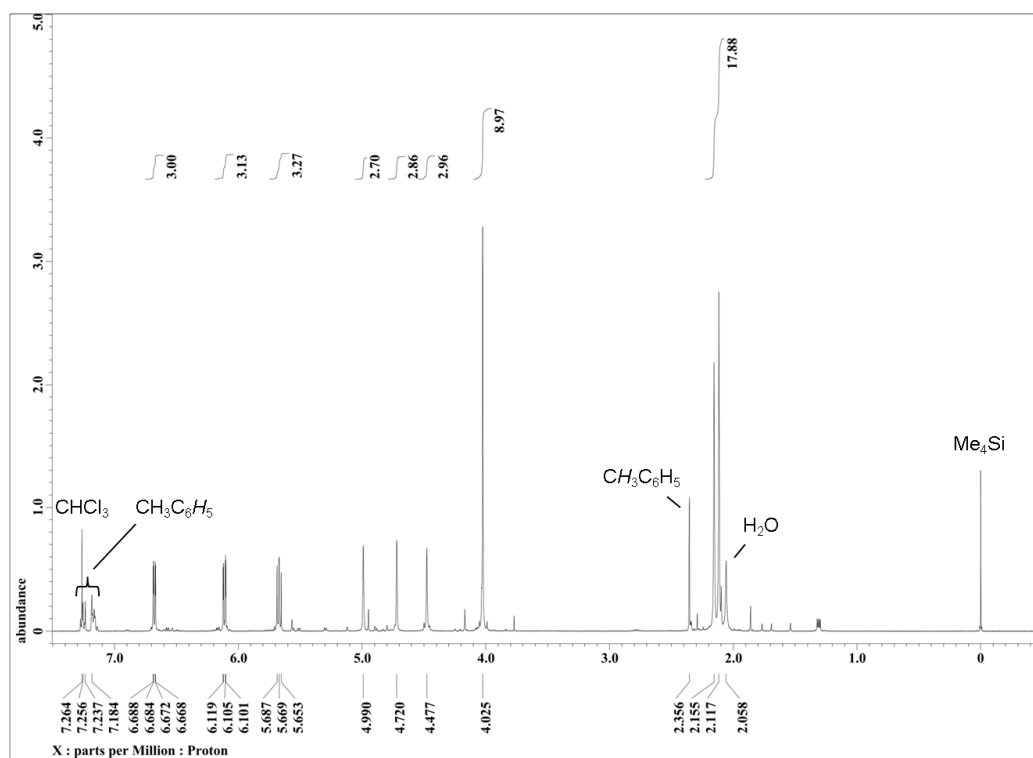

**<sup>1</sup>H NMR Spectrum of 3 (400 MHz; CDCl<sub>3</sub>; Me<sub>4</sub>Si)**

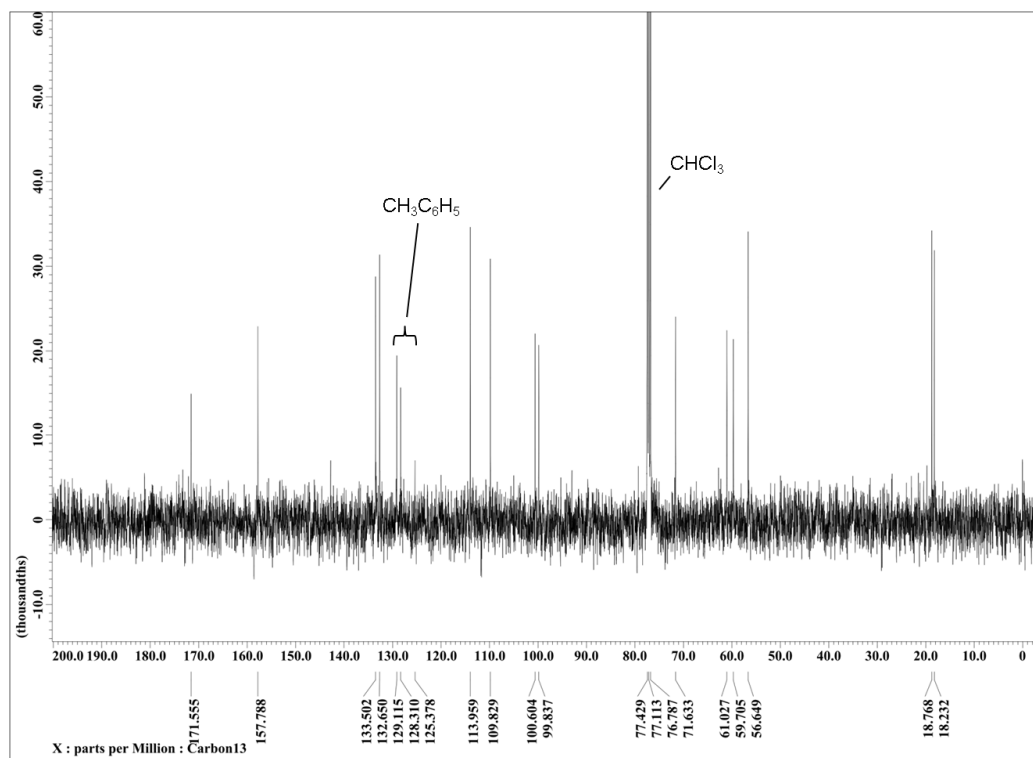

$^{13}\text{C}$  NMR Spectrum of 3 (100 MHz;  $\text{CDCl}_3$ ;  $\text{Me}_4\text{Si}$ )

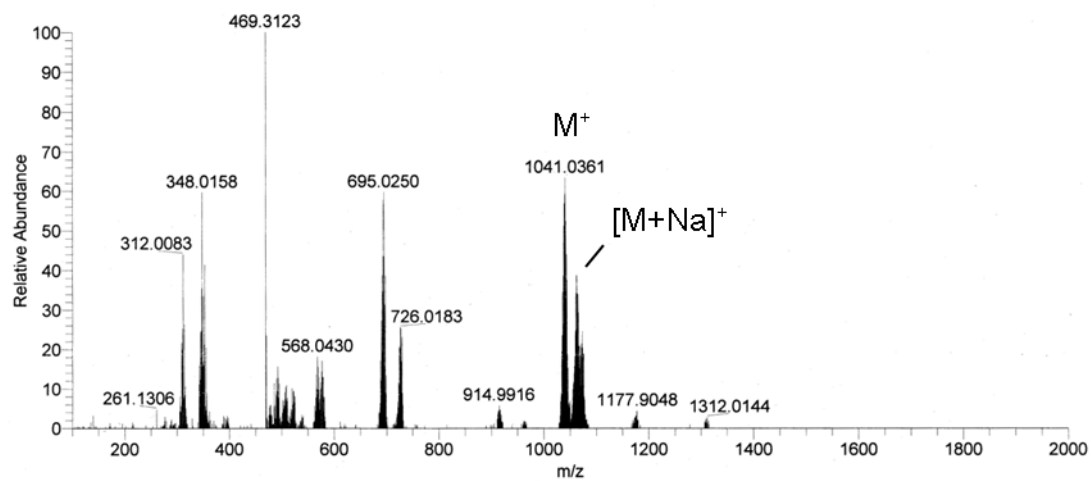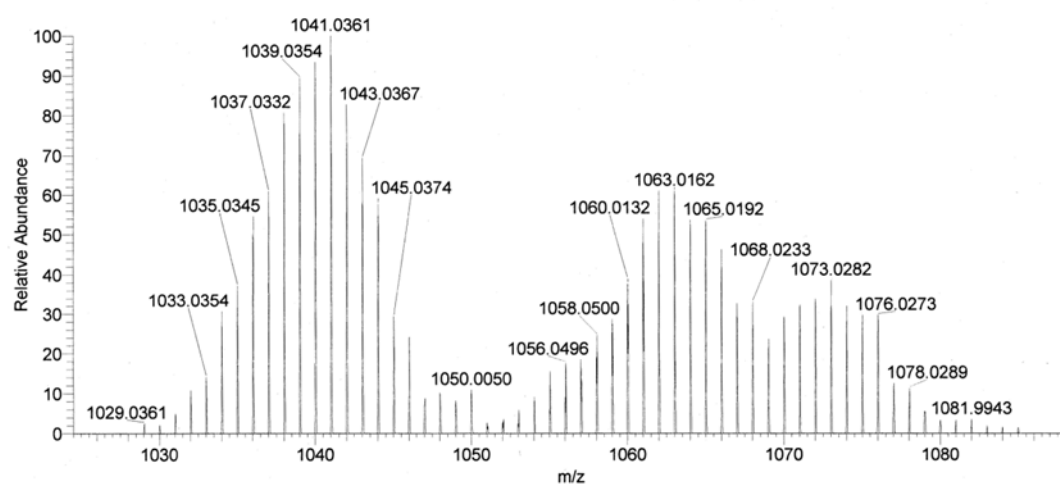

**Mass Spectrum of 3 (ESI+; CH<sub>3</sub>CN)**



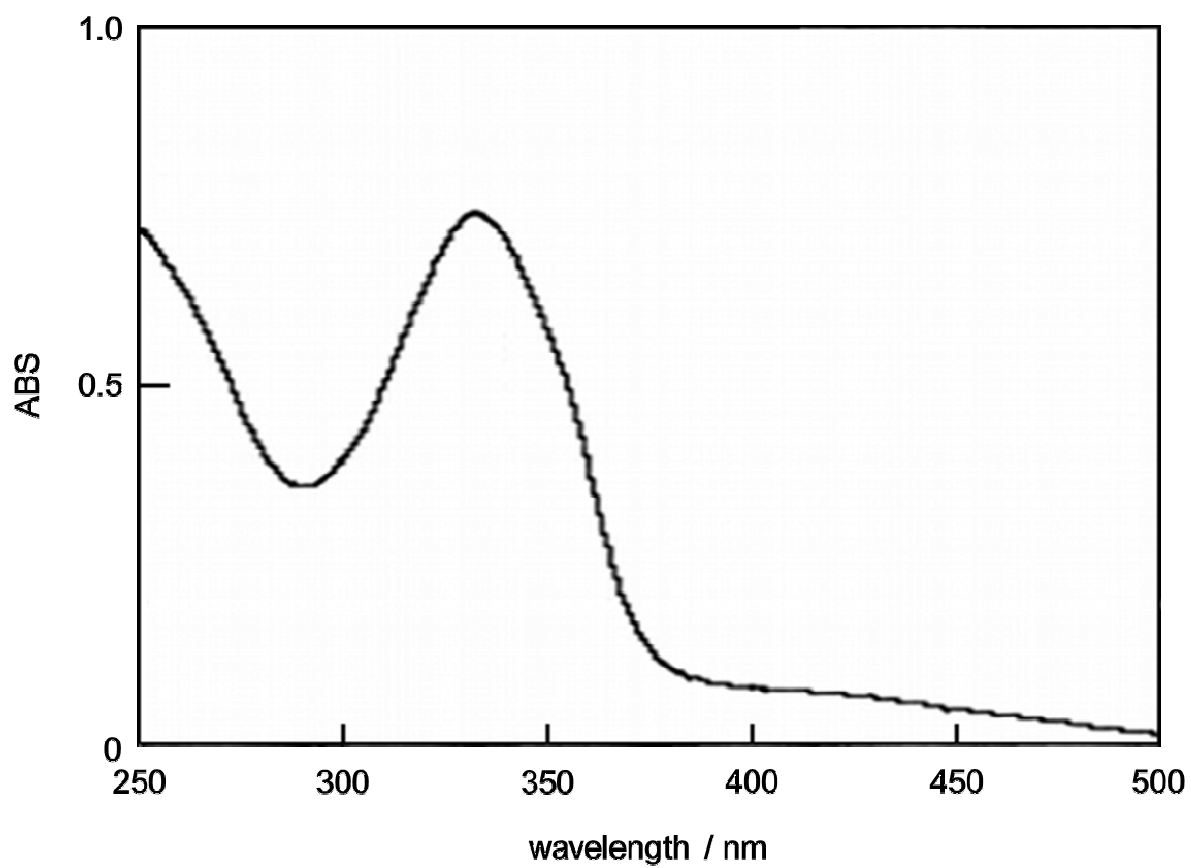

UV-Vis Absorption Spectrum of 3 ( $2.76 \times 10^{-5} \text{ mol dm}^{-3}$ ;  $\text{CH}_2\text{Cl}_2$ ;  $25^\circ\text{C}$ )
